# Supplementary material
Source: HighWire-hosted journal article supplement (http://qualitysafety.bmj.com/highwire/filestream/161592/field_highwire_adjunct_files/0/bmjqs-2021-014225supp001_data_supplement.pdf)
Supplement: bmjqs-2021-014225supp001_data_supplement.pdf [file bmjqs-2021-014225supp001_data_supplement.pdf]

**Appendix 1: AIM Obstetric Hemorrhage bundle gap analysis (hospital response in italics)**

| <b>Readiness: every unit</b>                                                                                                                                 | <b>Recognition and prevention: every patient</b>                                                                      | <b>Response: every hemorrhage</b>                                                                                                   | <b>Reporting/Systems Learning: every unit</b>                                                                                                                                                                                                                                                                                                                                                                                                                                                                                                                                            |
|--------------------------------------------------------------------------------------------------------------------------------------------------------------|-----------------------------------------------------------------------------------------------------------------------|-------------------------------------------------------------------------------------------------------------------------------------|------------------------------------------------------------------------------------------------------------------------------------------------------------------------------------------------------------------------------------------------------------------------------------------------------------------------------------------------------------------------------------------------------------------------------------------------------------------------------------------------------------------------------------------------------------------------------------------|
| Hemorrhage cart with supplies, checklist, and instruction cards for intrauterine balloons and compressions stitches: <i>in place - consistently executed</i> | Assessment of hemorrhage risk (prenatal, on admission, and at other appropriate times): <i>in place – not working</i> | Unit-standard, stage-based, obstetric hemorrhage emergency management plan with checklists: <i>in place - consistently executed</i> | Establish a culture of huddles for high risk patients and post-event debriefs to identify successes and opportunities: <i>not in place; we were debriefing hemorrhage cases if they involved activation of the massive transfusion protocol, however we were not debriefing all hemorrhage events</i>                                                                                                                                                                                                                                                                                    |
| Immediate access to hemorrhage medications (kit or equivalent): <i>in place - consistently executed</i>                                                      | Measurement of cumulative blood loss (formal, as quantitative as possible): <i>not in place</i>                       | Support program for patients, families, and staff for all significant hemorrhages: <i>not in place</i>                              | Multidisciplinary review of serious hemorrhages for systems issues: <i>in place – not working; we had a monthly peer review committee that was reviewing all deliveries in which 4 or more units of packed red blood cells were administered, however the review was from a provider management standpoint and not from an overall systems analysis. Additionally, since the committee was a peer review committee, it was comprised of only physicians and advanced practice providers from Obstetrics and Gynecology, Neonatology, and Anesthesiology and did not include nursing.</i> |

|                                                                                                                                                                                                     |                                                                                                                                                                                                                                                                                              |  |                                                                                                                                      |
|-----------------------------------------------------------------------------------------------------------------------------------------------------------------------------------------------------|----------------------------------------------------------------------------------------------------------------------------------------------------------------------------------------------------------------------------------------------------------------------------------------------|--|--------------------------------------------------------------------------------------------------------------------------------------|
| <p>Establish a response team - who to call when help is needed (blood bank, advanced gynecologic surgery, other support and tertiary services): <i>in place - consistently executed</i></p>         | <p>Active management of the 3rd stage of labor (department-wide protocol): <i>in place – not working; we were actively managing the 3<sup>rd</sup> stage of labor, however the amount and duration of oxytocin administered after delivery was not standardized amongst our patients</i></p> |  | <p>Monitor outcomes and process metrics in perinatal quality improvement (QI) committee: <i>in place - consistently executed</i></p> |
| <p>Establish massive and emergency release transfusion protocols (type-O negative/uncrossmatched): <i>in place - consistently executed</i></p>                                                      |                                                                                                                                                                                                                                                                                              |  |                                                                                                                                      |
| <p>Unit education on protocols, unit-based drills (with post-drill debriefs): <i>not in place; we held quarterly half-day hemorrhage simulations, however we did not have unit-based drills</i></p> |                                                                                                                                                                                                                                                                                              |  |                                                                                                                                      |
